# Supplementary material
Source: PubMed Central journal article supplement (PMC3630784)
Supplement: tjp0591-0257-SD1.pdf [file tjp0591-0257-SD1.pdf]

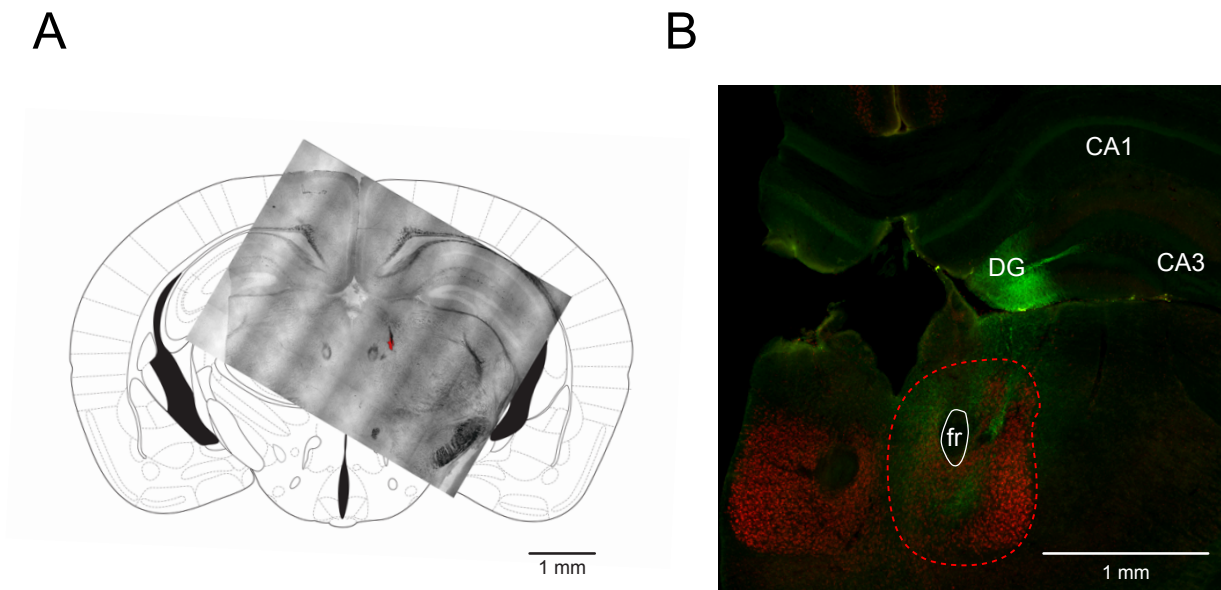

**Supplemental Figure 1: AAV injection location**

(A) Coronal brain section of a CAMKII-cre mouse injected with red fluorescent latex beads. This method was initially used to find the optimal coordinates for the injection of AAV particles. (B) Coronal section of an AAV-ChR2-YFP injected CAMKII-cre mouse stained for cerebellin-1 which was used as a marker of the parafascicular nucleus. This method was initially used to ascertain the degree of localization of the infected neurons using different injection volumes. DG = dentate gyrus, CA3 and CA1 = CA3 and CA1 field of the hippocampus, fr = fasciculus retroflexus.

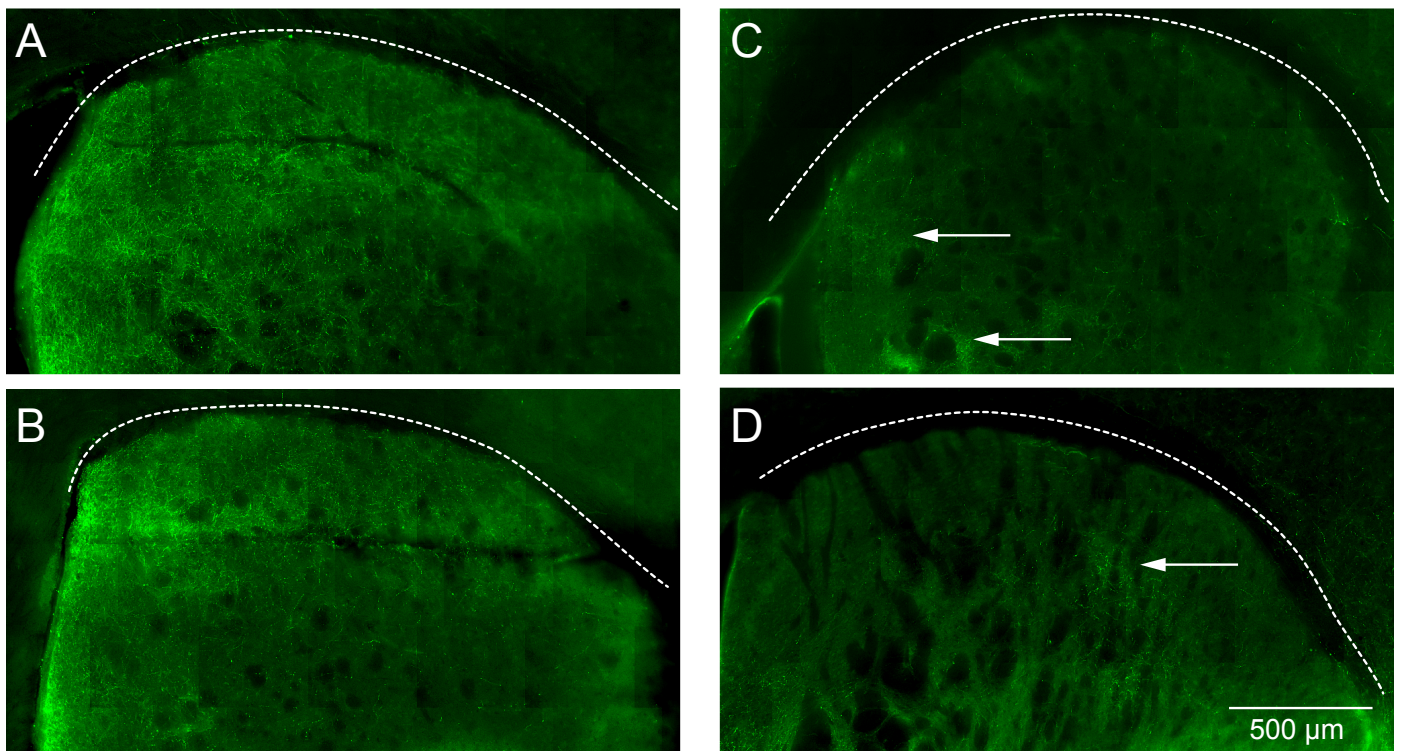

**Supplemental Figure 2:** *Expression patterns of ChR2-YFP fibres in the striatum*

In CL-injected animals, YFP-positive fibres were fairly evenly distributed across the dorsal striatum (A & B), but in the Pf-injected animals YFP-positive fibres were often distributed in patches intermingled with regions of less dense labelling (C & D). Dashed lines indicate the external capsule. The midline is to the left.

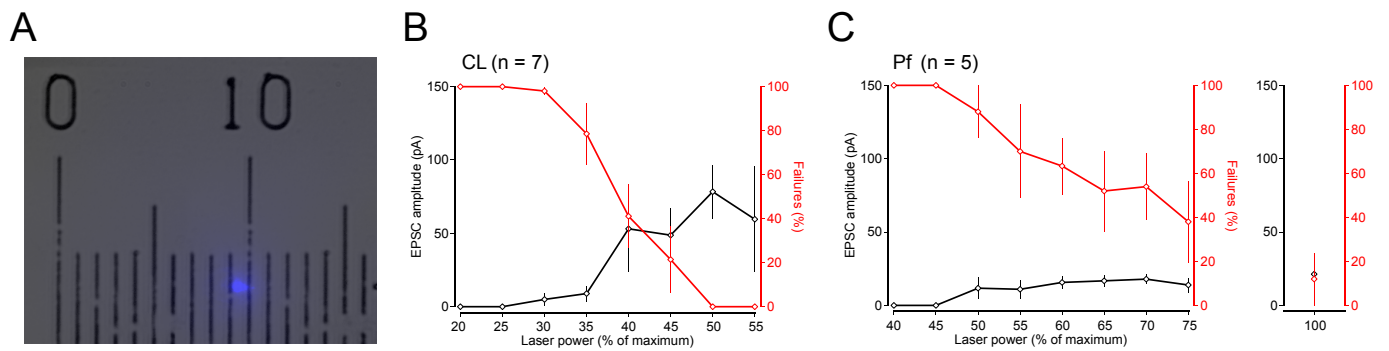

### Supplemental Figure 3: *Laser spot minimal stimulation*

(A) The spot size using laser stimulation is  $\sim 10$   $\mu\text{m}$  as measured with a glass graticule. (B) The amplitude of evoked EPSCs (black) and failure rate (red) with increasing laser stimulation at CL synapses. (C) The amplitude of evoked EPSCs (black) and failure rate (red) with increasing laser stimulation at Pf synapses.
